# Supplementary material
Source: PubMed Central journal article supplement (PMC2936959)

## Supplementary Information

### Methods

**Materials:** 2,5-dioxopyrrolidin-1-yl 4-azido-2-hydroxybenzoate (NHS-ASA) was purchased from ProChem. Inc (Rockford, IL). 6-Methyl-*N*<sup>1</sup>-(4-(pyridin-3-yl)pyrimidin-2-yl)benzene-1,3-diamine and *N*-(4-methyl-3-(4-(pyridin-3-yl)pyrimidin-2-ylamino)phenyl)-4-(piperazin-1-ylmethyl)benzamide (*N*-desmethyl imatinib) were purchased from ChemPacific Inc (Baltimore, MD). 2,5-dioxopyrrolidin-1-yl 5-((3*a*S,4*S*,6*a*R)-2-oxo-hexahydro-1*H*-thieno[3,4-*d*]imidazol-4-yl)pentanoate (Biotin-OSu), *N*-(chloro(dimethylamino)methylene)-*N*-methylmethanaminium hexafluorophosphate (TCFH), trifluoroacetic acid (TFA), 1*H*-benzo[*d*][1,2,3]triazol-1-ol (HOBt) and *N,N*-diisopropylethyl amine (DIPEA) were purchased from Sigma-Aldrich (St. Louis, MO). *Tert*-butyl 2-(piperazin-1-yl)ethylcarbamate was purchased from Astatech Inc (Bristol, PA).

**Synthesis of an imatinib derived photo-affinity label, G01:** DIEPA (63  $\mu$ l, 0.36 mmol) was added to a solution of NHS-ASA (50 mg, 0.18 mmol), HOBt (25 mg, 0.18 mmol), and 6-Methyl-*N*<sup>1</sup>-(4-(pyridin-3-yl)pyrimidin-2-yl)benzene-1,3-diamine (50 mg, 0.18 mmol) in DMF (2 ml). The reaction mixture was stirred at room temperature overnight under argon atmosphere. The generated crude product was purified by a semi-preparative HPLC to give 54 mg of the titled compound with a yield of 68%. The product, **G01**, 4-azido-2-hydroxy-*N*-(4-methyl-3-(4-(pyridin-3-yl)pyrimidin-2-ylamino)phenyl)benzamide, was confirmed by mass spectral analysis using an ESI-MS in the positive mode  $[M+H]^+$ , demonstrating a  $m/z$  of 439.1.

**Radioiodination of G01** by  $^{125}\text{I}$  was performed without carrier using a modification of a Chloramine-T procedure and the iodinated product was purified by HPLC. Specifically, in a UV protected "V" vial, total volume 0.9 ml,  $\sim 10$  mCi of  $^{125}\text{I}$  stock isotope (volume = 25  $\mu\text{l}$ ) was added to 200  $\mu\text{l}$  of 0.2M phosphate buffer, pH 7.2. G01 was dissolved to 1 mg/ml in ethanol and 25  $\mu\text{l}$  of this solution was combined with chloramine-T at 1 mg/mL in water (50  $\mu\text{l}$ ) and then added to the V-vial. The reaction proceeded for 1 min and was terminated by the addition of 50  $\mu\text{L}$  of 1 mg/ml meta-bisulfite. The reaction mixture was chromatographed on a 25 cm Waters RP-C18 column, using 0.1% TFA in water as the "A" solvent and 0.1% TFA in acetonitrile as the "B" solvent. A gradient was run at 1 ml/min from 0% B to 50% B for 45 minutes and held at 50% B for 15 minutes. The product demonstrated a retention time of 54.5 min as followed by radiochemical detection, and had a specific activity of 2000 Curies per millimole. The  $\text{I}^{125}$  labeling experiment was performed by PerkinElmer Life and Analytical Sciences, Inc.

$^3\text{H-G01}$  was prepared by ViTrax Radiochemicals via catalytic tritium exchange of G01. The labeled product was purified by HPLC. The composition of the purified product was verified by co-injection of the tritium labeled product with its cold precursor and both compounds co-chromatographed on an analytical HPLC.

#### **Cellular A $\beta$ production assays and incubation with G01.**

Neuroblastoma 2a cells stably overexpressing human APP695 were treated with 10  $\mu\text{M}$  G01 for 3 hr. Cells treated with DMSO, or DMSO plus imatinib, were used as controls. After 3 hr, conditioned medium was collected and A $\beta$  immunoprecipitation was conducted using 4G8 antibody. The immunoprecipitated A $\beta$  was separated on 10-20% Tris-tricine gel, transferred to PVDF membrane and detected by 6E10 antibody.

**Synthesis and kinase profiling of biotin-imatinib (active and inactive form): Inactive biotin-imatinib, (IC200001)** was synthesized by reacting N-desmethyl imatinib with Biotin-OSu. **Active biotin-imatinib, (IC339239)** was synthesized from the key intermediates, tert-butyl 2-(piperazin-1-yl)ethylcarbamate and 6-methyl-*N*<sup>1</sup>-(4-(pyridin-3-yl)pyrimidin-2-yl)benzene-1,3-diamine, via 4 steps, as shown in supplementary figure 1.

The kinase profiling was performed by Millipore Inc. using the standard assays for Abl kinase and PDGF receptor (ATP = 45  $\mu$ M). Compound IC200001 showed no significant inhibitory activity toward either kinase, while compound IC339239 had an IC<sub>50</sub> of 146 nM against Abl kinase (imatinib had an IC<sub>50</sub> of 79 nM) and an IC<sub>50</sub> of 6.6  $\mu$ M against PDGF receptor (imatinib had an IC<sub>50</sub> of 4.8  $\mu$ M). Thus, we refer to IC200001 as “inactive biotin-imatinib” and IC339239 as “active biotin-imatinib”.

#### **Construction of APP-CTF truncated forms**

APP-CTF-T1 is the truncated form of APP- $\beta$ -CTF spanning from its N-terminus to HHGV<sup>64</sup>; APP-CTF-T2 is the truncated form of APP- $\beta$ -CTF spanning from its N-terminus to VMLKK<sup>55</sup>. Both truncated forms were generated by introducing a stop codon in related positions of the CT100 (APP-CTF) in pcDNA4. Mutagenesis was performed using QuickChange Site-Directed Mutagenesis kit (Stratagene) according to the manufacturer's instructions. The primers used for APP-CTF-T1 are: Forward: 5' CATTTCATCATGGTGTGTAGGAGGTTGACGCCGC 3'. Reverse: 5' GCGGCGTCAACCTCCTACACACCATGATGAATG 3'. The primers used for APP-CTF-T2 are: Forward: 5' CTTGGTGATGCTGAAGAAGTAACAGTACACATCCATTC 3' Reverse: 5'

GAATGGATGTGTACTGTTACTTCTTCAGCATCACCAAG 3'. The presence of the stop codon and integrity of the cDNA were verified by sequencing.

### **Construction, expression, and analysis of APP/NICD and Notch $\Delta$ E/AICD**

APP/NICD and Notch $\Delta$ E coding sequences were synthesized by Genscript Inc. and are illustrated in supplementary Fig. 10. Both sequences were then incorporated into a pcDNA3.1 vector coding for a C-terminal Myc tag. APP-CTF/NICD, APP-CTF, and Notch $\Delta$ E/AICD were overexpressed separately in HEK293 cells. Immunoprecipitation was conducted using gSAP antibody. APP/NICD and Notch $\Delta$ E/AICD were detected by c-myc antibody. APP-CTF was detected by 369 antibody.

APP-CTF/NICD, APP-CTF, and Notch $\Delta$ E/AICD were transfected into N2a cells with/without gSAP siRNA knockdown. NICD was detected by both myc antibody and cleavage specific Val1844 antibody (Cell Signaling); AICD was detected by myc antibody. AICD production from APP-CTF was detected by 369 antibody.

### **Mouse administration of a $\gamma$ -secretase inhibitor dibenzazepine (DBZ)**

gSAP RNAi mice (6 months old) were administered dibenzazepine (DBZ) (10  $\mu$ mol/kg) once daily for 5 days by intraperitoneal injection. DBZ was suspended finely in 0.5% (w/v) hydroxypropylmethylcellulose and 0.1% (w/v) Tween 80. Mice were treated with DBZ or with vehicle, with 4 mice in each group. After sacrificing, mouse brain was removed for A $\beta$  ELISA assays (Invitrogen); Mouse intestine was processed for H&E and PAS staining.

## Supplementary Figure Legends

**Supplementary Figure 1.** gSAP action on APP processing. Ternary complex of gSAP, APP and  $\gamma$ -secretase (top) is associated with elevated  $\gamma$ -cleavage ( $A\beta$  production) and reduced  $\epsilon$ -cleavage (AICD production). In the absence of gSAP (bottom), the binary complex of APP and  $\gamma$ -secretase is associated with decreased  $\gamma$ -cleavage and increased  $\epsilon$ -cleavage.

**Supplementary Figure 2. a:** structures of imatinib, G01, and  $^{125}\text{I}$ -G01. **b:** G01 significantly reduces levels of  $A\beta$  in N2a cells.

**Supplementary Figure 3. a:** Procedures for the synthesis of biotinylated imatinib derivative, IC339239: reagents and conditions: **(a)** 4-(bromomethyl) benzoic acid,  $\text{K}_2\text{CO}_3$ , DMF, room temperature, 2 h. **(b)** 6-methyl- $N^1$ -(4-(pyridin-3-yl)pyrimidin-2-yl)benzene-1,3-diamine, TCFH, DIPEA, DMF, room temperature, overnight. **(c)** TFA,  $\text{CH}_2\text{Cl}_2$ , room temperature, 30 min. **(d)** Biotin-OSu, HOBt, DIPEA, room temperature, overnight, and then HPLC purification. Compound IC200001 was synthesized by reacting N-desmethyl imatinib with Biotin-OSu.

**b:** Kinase profiling results shows that IC339239 has activities comparable to those of imatinib, while IC200001 showed no activity. Therefore, IC339239 is designated as “active biotin-imatinib” and IC200001 as “inactive biotin-imatinib”.

**Supplementary Figure 4.** Alignments of gSAP sequences among species. Red: identical residues; Blue/Green: conservative substitutions. The C-terminal region of gSAP is highly conserved. The gSAP-16K region is underlined.

**Supplementary Figure 5.** gSAP mRNA expression levels in different tissues. Tissues from 3 month old wild type BL/6 mice were harvested and gSAP levels were quantitated

using real time PCR. Both actin and GAPDH served as internal controls (n=6). Tissue extracts were adjusted to the same protein levels prior to analysis.

**Supplementary Figure 6.** gSAP knockdown does not influence the generation of  $\alpha$ -, or  $\beta$ -APP-CTF from full length APP. N2a cells overexpressing APP695 were pre-treated with the  $\gamma$ -secretase inhibitor, L685,458 [1  $\mu$ M] and the cleavages of APP were monitored by pulse-chase labeling ( $^{35}$ S-methionine) followed by immunoprecipitation. Proteins were separated by SDS-PAGE and transferred to PVDF membrane for autoradiography.

**Supplementary Figure 7.** Regulation of AICD production by gSAP. **a.** Either gSAP knockdown or imatinib treatment increases AICD levels in N2a cells overexpressing APP695 (\*\*p < 0.01; n=3). **b.** Transfection of gSAP into HEK293 cells overexpressing APP-CTF led to reduced AICD production and increased A $\beta$  production. Cleavage of APP-CTF was monitored by pulse-chase labeling at indicated time point. AICD and A $\beta$  levels after the 3 hr chase were quantitated (\*\*p < 0.01; n=3).

**Supplementary Figure 8.** After separation of organelles from N2a cells on a continuous sucrose gradient, endogenous gSAP co-localizes with  $\gamma$ -secretase in a Golgi-enriched fraction (No. 6), which also contains endosomes.

**Supplementary Figure 9.** Truncation of APP-CTF and immunoprecipitation using gSAP antibody through gSAP demonstrates that gSAP interacts with the juxtamenbrane region of APP-CTF. APP-CTF-T1 is the truncated form of APP- $\beta$ -CTF spanning from its N-terminus to HHGV<sup>64</sup>; APP-CTF-T2 is the truncated form of APP- $\beta$ -CTF spanning from its N-terminus to VMLKK<sup>55</sup>. Truncated forms were overexpressed in HEK293 cells and immunoprecipitated with gSAP antibody. 6E10 antibody was used for immuno-detection.

**Supplementary Figure 10.** Domain exchange studies demonstrate that gSAP regulates  $\epsilon$ -cleavage of APP-CTF but not Notch $\Delta$ E, through selective interaction with AICD. **a.** Design of APP-CTF/NICD and Notch $\Delta$ E/AICD constructs. **b.** APP-CTF/NICD, APP-CTF, and Notch $\Delta$ E/AICD were overexpressed separately in HEK293 cells. Both APP-CTF and Notch $\Delta$ E/AICD interact with gSAP, while APP-CTF/NICD does not. **c.** Effects of gSAP knockdown on the cleavage of APP-CTF/NICD, APP-CTF, and Notch $\Delta$ E/AICD by  $\gamma$ -secretase. Individual constructs were overexpressed in N2a cells. Upon gSAP knockdown, AICD production from APP-CTF (center panel) as well as from Notch $\Delta$ E/AICD (right panel) increased, but NICD production from APP-CTF/NICD was not influenced (left panel).

**Supplementary Figure 11.** Comparison of the effects of either reducing gSAP or of a  $\gamma$ -secretase inhibitor on A $\beta$  levels and histopathology. **a.** Mice were given a  $\gamma$ -secretase inhibitor DBZ (10  $\mu$ mol/kg) for 5 days. This resulted in reduced A $\beta$ 40 and A $\beta$ 42 levels of 44 $\pm$ 9% and 47 $\pm$ 5% respectively. **b.** No histopathological changes were observed in mouse small intestine after gSAP knockdown (H&E and PAS staining). However, increased amounts of violet-stained goblet cells were observed after DBZ administration, a finding typical of Notch inhibition.

Supplementary Figure 1

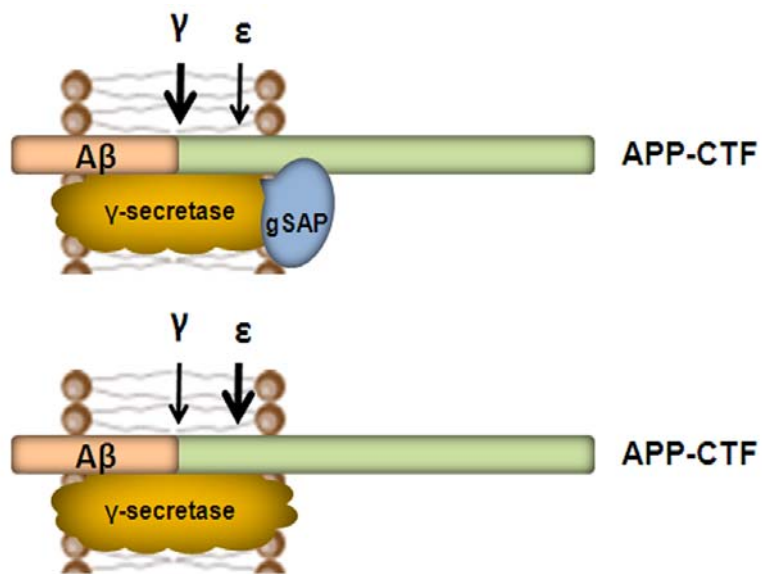



## Supplementary Figure 2

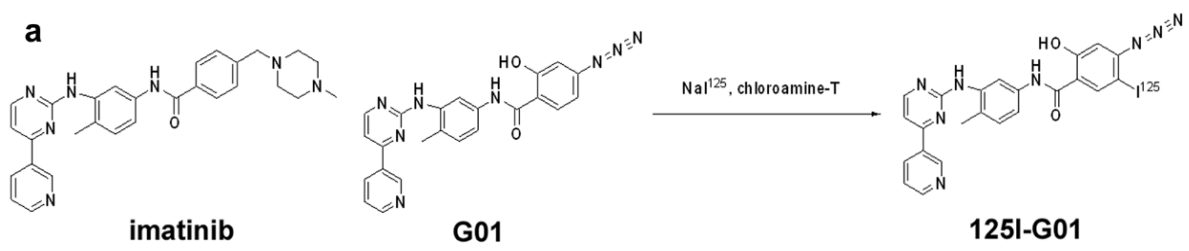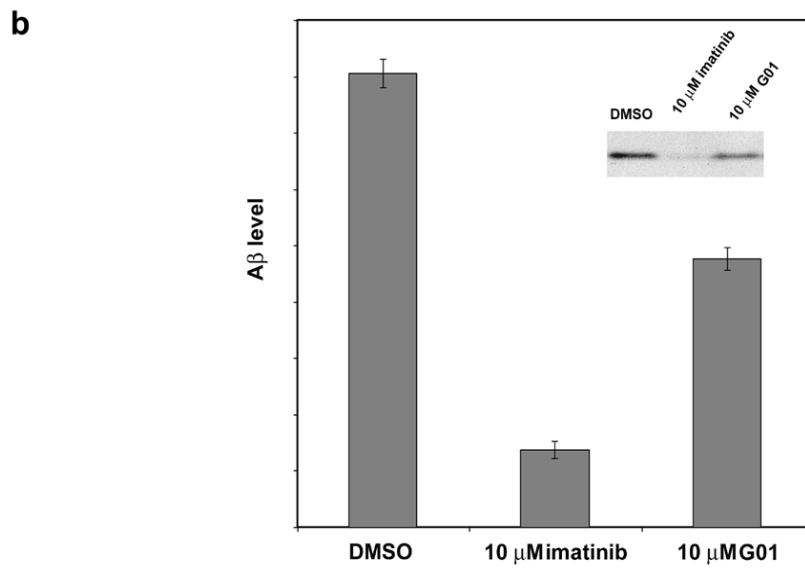

### Supplementary Figure 3

**a**

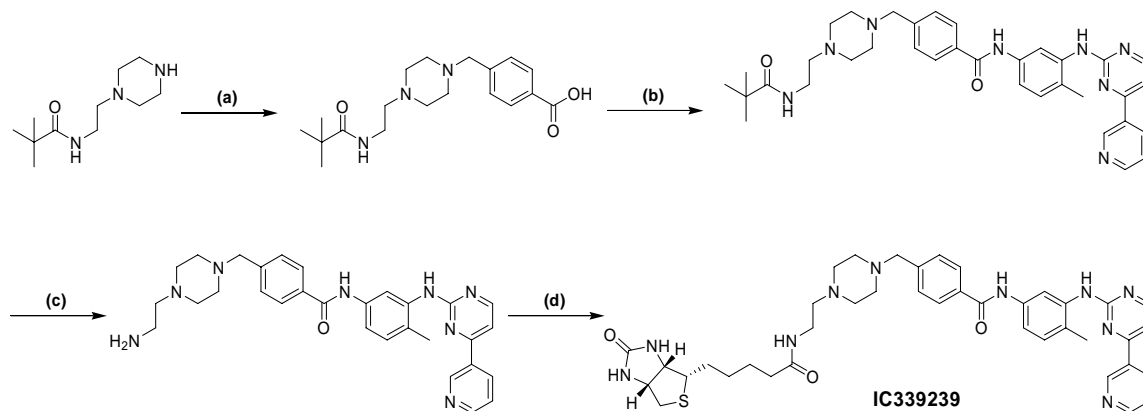

**b**

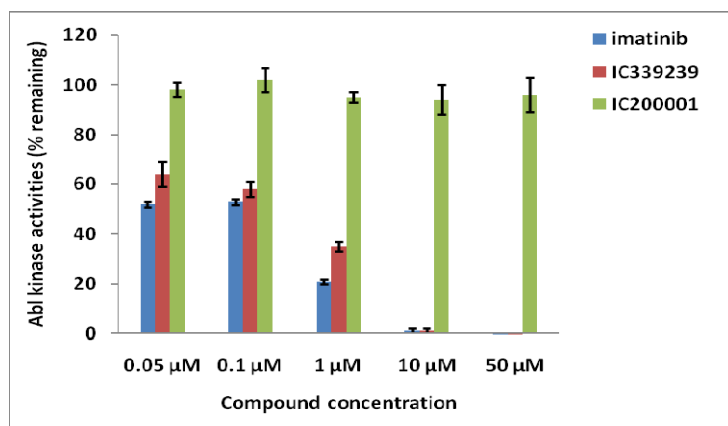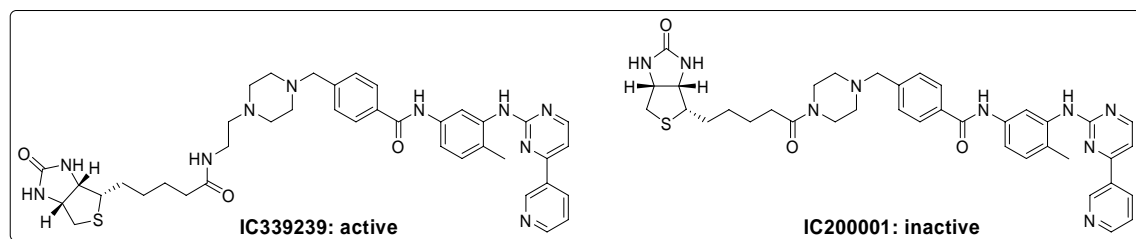

## Supplementary Figure 4

|        |                                                                |
|--------|----------------------------------------------------------------|
| Homo   | -----MALRLVADFDL GKDVLPWLR A                                   |
| Canis  | -----MTQNLSWPGH                                                |
| Bos    | -----MALRLIADFDLEKDVLPWLRV                                     |
| Mus    | -----MALRLVTHFDVLEDEVLP SLLT                                   |
| Rattus | -----MALRLVTHFDVLADVLP SLLV                                    |
| Gallus | MAVAAPQQPARCGGQRPECGRVGPRRLRALPSGGRRSQAGRESPRAAHGAASPLP LPSGPG |
|        |                                                                |
| Homo   | QRAVSEASGAGSG-----GADVLENDYES--                                |
| Canis  | SSNGSCIRFPVAG-----GTAVL-----                                   |
| Bos    | QLAASAAAGARGG-----GPGVLENNYEC--                                |
| Mus    | QAATTEDEGDRAGV-----LETTYG----S--                               |
| Rattus | QAATADEGDEGA-----ETTLG----S--                                  |
| Gallus | RLEATGGRGNGGASGRPQLRGLSPPAPLPCGGCAGPELRGLTSLCGGSALDTSEKSSA     |
|        |                                                                |
| Homo   | LHVLNVERNGNI IYTYKDDKGNVVFGLYDCQTRQNELLYTFEKDLQVFSVNSERTLLA    |
| Canis  | -----WQGAVSSIQGLGTADHELPTWRAYEQLPYADLA                         |
| Bos    | LRVLNVERNRI IYTYKDNKGNVVFGLYDYQTKQNEHLYTFEKDLQVSSVNSKEKTLA     |
| Mus    | LRVLNIERNNGNI IYTYKDNKGNVAVFGLYDCQTRQNEHLYTFEKDMQAVSSVNSERTVLA |
| Rattus | LRVLNIERNGDI IYTYKDNKGNVAVFGLYDCQTRQNEHLYTFEKDMQAVSSVNSERTVLA  |
| Gallus | LYIVNVERNGKI IYTWKGNQRSTHIGLYDLQTKENEHLYTFEKDLRIISVNSERTLLA    |
|        |                                                                |
| Homo   | ASLVQSTK-EGKRNELQPGSKCLTLLVEIHPVNNVVKLVKAVDSYI WVQFLYPHIESHPLP |
| Canis  | SVDLCIQL-LIPFAFIPTGSKCLTLLVEIHPVNNVVKLVKAVDSSI WVQFLYPQVESHPPP |
| Bos    | TSLVQAAK-EGRSNELQPGSKCLTLLVEIHPINNPKLVKAVDSYI WVQFLYPHVESCPQP  |
| Mus    | ASFIQYTT-EGVKNDLQPGSKCLTLLVEIHPVNNVVKLVKAVDSCVWVQFLYPQAESHLLP  |
| Rattus | ASFIQYT--EGVRSELQPGSKCLTLLVEIHPVNNVTVLKAVDSCVWVQFLYPQAESHLLA   |
| Gallus | VSFRQYTEEERVTHLLQSVSKYLALLIEIHPINNPKLVKAVDSCVRVQFLYPVEDRNSST   |
|        |                                                                |
| Homo   | ENHLLLISEEKYIEQFRIHVAQEDGNRVVIKNSGHLPRDRIAEDFVWAQWDMSEQRLYYI   |
| Canis  | ENHLLLISEEKYIEKFHIVIQEDGNKVVLRDSGHLPRERVAEDFVWAQWDMSEQRLYYI    |
| Bos    | KNHLLLISEEKYIEQFHIQVVEDGNRVVIKNSGHLPRERIAEDFVWAQWDMSEQRLYYI    |
| Mus    | QNHLLLISEEKYIERFHIQITREDGDRVIVIRNSSHLPRDLAEDFVWAQWDLSEQRLYYI   |
| Rattus | QNHLLLISEEKYIERFHIQITREDGNRVVIRNSSHLPRERIAEDFVWAQWVSEQRHYI     |
| Gallus | ESHLLLVSEDKYIEQFDIHVAEEE-HRVVIQNSGQLPRARVADDLIWAQWDMTEQRIFYI   |
|        |                                                                |
| Homo   | DLKKSRSILKCIQFYADESYNLMFEVPLDISLSNSGFKLVNFGCDYHQYRDKFSKHLTLC   |
| Canis  | VLKKSRSILKCIQFSANEKFNLMFEAPLDITLSASGFELVNFGCDDLQDQGNLSKHLTLC   |
| Bos    | DLKKSRSVLKCIQFYAEHFNLMFEAPLDISLSDSGFKLVNFGYSDLQDKEELSEHLTLC    |
| Mus    | ELKESRSILKCIQFRADESFNLMFEMPLDITLTGLRFKLVNFGYDYRQDREKLCNQPSLC   |
| Rattus | ELQESRSILKCVQFWADESFTIMFEMPLDISLSGLRFKLVNFGYDYRQDQAKLCHQPSLC   |
| Gallus | VPKESRSILRCVQFYPDENFNSTLESQLDISVNDKRVKLVNFGYNDCEDRDVPPKSLNLQ   |
|        |                                                                |
| Homo   | VFTNHTGSLCVCYSPKCASWGQITYSVFYIHKGHSKFTTTSLENVGSHMTKG-----      |
| Canis  | VFTNHTGSLCVCYSPKFDSEKITYSVFYFHKGHSKFTTAALGSVDSLVTKG-----       |
| Bos    | VFTNHTGSLCVCYCPNFDSWEQITYSVFYFHKGHSKFTTTLGSVDSHVTKG-----       |
| Mus    | IFTNHTGSLCMCYSKSDSREEITYSVFYLHKGYRKIFTAAPGSADSQVTNGADSQVTDG    |
| Rattus | IFTNHTGSLCVCYSPKSDSWKEITYSVFYLHKGYRKFTVAPGSTDSQVANG-----       |
| Gallus | VFTNKAG-----FSKFTTASLERPETPQLKE-----                           |
|        |                                                                |
| Homo   | ITFLNLDYYVAVYLPGHFFHLLNVQHPDLICHNLFLTGNNEIDMLPHCPQLQSLSGSLVL   |
| Canis  | LTFLNLDYYVAVYLPGHFFHLLNIQHPDLICHSLFLTGNNEVVDMLPHSPLQSLSGSLVL   |
| Bos    | ITFLNLDYYVAVYLPGHFFHLLNIQHPDLICHSLFLTENSEVIDMLPHSPLQSLSGSLVL   |
| Mus    | IAFLNLDGYFVAVYSPGHFLHLLNIQHPDLVCHSLFLTGNNKIAAVLPPSPLQSLPGSLVL  |
| Rattus | VTFLNLDGYFVAVYSPCRFLHLLNIRHPDLICHSLFLTGNNKTAAVLPPSPLQSLPGSLIL  |

Gallus VAFNLNDYYVAAYLPGQFLHLLNIQHPDLLCYSLFLTGEDARIDMLPNCISIQSPLVSTVL

Homo DCCSGKLYRALLSQSSLLQLLQNTCLDCEKMAALHICALYCGQGAQFLEAQIIQWISENVS  
 Canis DWCSGKLYRALLNQSYLLQFLWNTQLDCEKMAVLHCVLSCGRDPRFLEAKIIQWISENIS  
 Bos DSRSGKLYRVLLNQSYLEVFLRSARLDCERMALHICALSHGRDPRRLEAKIIQWISENIS  
 Mus DCYSGKVYRVTLDQSYLLRFLWNAHLDCERMAALHICALSQCSDPGFPEEQIIQWISEHVS  
 Rattus DCSSGKVYRATLDQSYLMGFLWNAQLDCEKMAALHICALSCSDPGFPE-QIVQWVSERVS  
 Gallus DCCIGRLYAMSI SDSALLKYLQNSKRDSERLAALHICALLCVRRTTDLEMKIIWWISENLS

Homo ACHSFDLIQEFIIASSYWSVYSETSNMDKLLPHSSVLTWNTEIPGITLVTEDIALPLMKV  
 Canis TCHSFDLIQEFIIASSYWSIYPETSNIDKLLPYSSVLTWNTEIPGITLVTTEEITLPLMKV  
 Bos ACHSFDLIQEFIIASSYWSIYPETSNMDKLLPYSSLLTWDTEIPGITLVTTEEIPLPLMKV  
 Mus ACHSFDLIQEFIIASSYWSVYAELDDMGMLLQYSSVLTWNTEIPGIKFTTEELPLPLMKV  
 Rattus ACHSFDLIQEFIIASSYWSVYPGLDDVDLLPYSSVLTWDTEIPGMKLVTEELPLPLMKV  
 Gallus TCHSFDPIQEFIIASLYCRMCPETNNLDKLLPYTSLLDWTGVIIPGVACATDIISLPVLEM

Homo LSFKGYWEKLNNSNLEYVKYAKPHFHYNNSVVRREWHNLI SEEKTGKRRSAAYVRNILDNA  
 Canis HSFKGYWEKLNNSNLEYVKCSKPCLLYNNMSVKREWHSLI SEEKTGRRRSMVYVRNIFDNA  
 Bos HSFKGYWEKLNNSNLEYVKYKPHLHYNNSVVRREWHNLI SEEKTGKRRSTVYVRNILDNA  
 Mus YGLKGYWAKLNNSNLEYIKYTKPHLHYHNSVVRREWHNLI SEERTGKRRSTMYVRNILENA  
 Rattus YSLKGYWAKLNNSNLEYIKYTKPHLHYHNSVVRREWHNLI SEERTGKRRSTMYVRNILDNA  
 Gallus QNSKGFWEKLDNSNLESVKYAEPHLHYHNNVLRREWRNLSEE-----

Homo VKVISNLEARNLGPRLTPLLQEEDSHQRLLMGLMVSELKDHFRLHRLQGVEKKKIEQMVL D  
 Canis MKVISNLEARNLEPRLTPLFQEEDYHQRLLI GLMVSELREHLLRHLQGIKKKIEQMVL D  
 Bos IKVISNVEAKNLEPRLTPLFQEEDTHQQLI GLMVSELREHLLRHLQGV EKKKIEQMVL D  
 Mus MKVIASMETRTLEPRLIPLFQEEDRHQRLLMGLMVSELRDHLLRHLQGV EKKKIEQMVL D  
 Rattus VKVISNMEMKTFEPRLIPLQEEDRHQRLLMGLMVSELRDHLLRHLQGV EKKKIEQMVL D  
 Gallus -----MVAQLKDHLMRHLQYVGGKKIDQIVLD

Homo YISKLLDLICHIVETNWRKHNLHSWVLHFNSRGSAAEFVVFHIMTRILEATNSLFLPLPP  
 Canis YISKLLDLICQILETSWRTHLHPWVLHL--RASAAEFTVFHIMTRILEATMSLFLPLPP  
 Bos YVSKLLDLICQILEASWRKHNLHPWALHFNRQASAAEFVVFHIMTRILEATNTLFLPLPP  
 Mus YISKLLDLIWCLLET SWRKHSMPHLVHLHNSHCSAADFEVFHLMTRILDAASSLCLPLPP  
 Rattus YISKLLDLVWCLLET SWRKHSVHPWVLHLNEHGS PADFEVFHLMTRILDAASSLCFPLPP  
 Gallus YVANLLNLVHRIMKEVWKIHLQHS C IFCFDERGSEAEFRVVFHIMSRILEAANGMCMPLPP

Homo GFHTLHTILGVQCLPLHNLHLCIDSGVLLLTETAVIRLMKDLDNTEKNEKLFKFSIIVRLP  
 Canis GFHTLHTILGVHCLPLHNLHLYIDSGVLLLTETAVIRLMKDLDNSENNEKLFKFSIIVRLP  
 Bos GFHTLHMILGVRCLPLHNLHLYIDHGVL L L T E A A V T R L M K D L D N T E K N E K L F K F S I I M R L P  
 Mus GFHSLHTILGVHCLPLYSLHLYIDNGVLLLTETAVTRLMKDLDNSEKNEQLKFSIIVRLP  
 Rattus GFHSLHTILGVHCLPLYNLLHYIDNGVLLLTETVTRLMKDLDNSEKNEKLFKFSIIVRLP  
 Gallus GFHSLHLGLGVRCLPLHTLLHYIDNGVLLHTETCVRKLKLDLDDNEKNEKLFKFSIVTRLP

Homo PL----IGQKICRLWDHPMSNII SRNHVTRLLQNY--KKQPRNSMINKSSFVVEFLPLNY  
 Canis PH----IGQKICRLWDHPMSNII SRNHVKQLLLNY--KKQPQSSMIDKSPGSVEFLPLNY  
 Bos PL----TGQKICRLWDHPVSNII SRNHVKRLLQNY--NKQPWSSVMDKSSFVVEFLPLNY  
 Mus PL----IGQKVCRLWDHPMSNII SRNHVARLLKNY--RKEPRNSMIDKSSFVVEFLPLNY  
 Rattus PL----IGQKVCRLWDHPMSNII SRNHVAQLLQNY--KKEPQSSMIDKSSFVVEFLPLNY  
 Gallus EVTLDALGLKARQFWDHPVANFRARKYVKLLLEKLGNRQCSRVPVPERHPVCVEFLPLNY

Homo FIEILTDIESSNQALYPFEGHDNVDAEFVEEAALKHTAMLLGL---  
 Canis FIEILTDIESSNQALYAFEGHDNVDAKFVEEAALKHTTMLLGL---  
 Bos FIEILTDIESSNPALYAFEGHDNVDAKFVEEAALKHTAMLLGL---  
 Mus FIEILMGLLESSNQALYGFEGHDNVDAEFVEEAALKHTTMLLGL---  
 Rattus FIEILMHLESSNQALHGFEGHDNVDAEFVEEAALKHTTSLLLGL---  
 Gallus LTNVLAEIES--QGVHLYEKQDHINVRFVEEAALKHTMMLLGLRYS

Supplementary Figure 5.

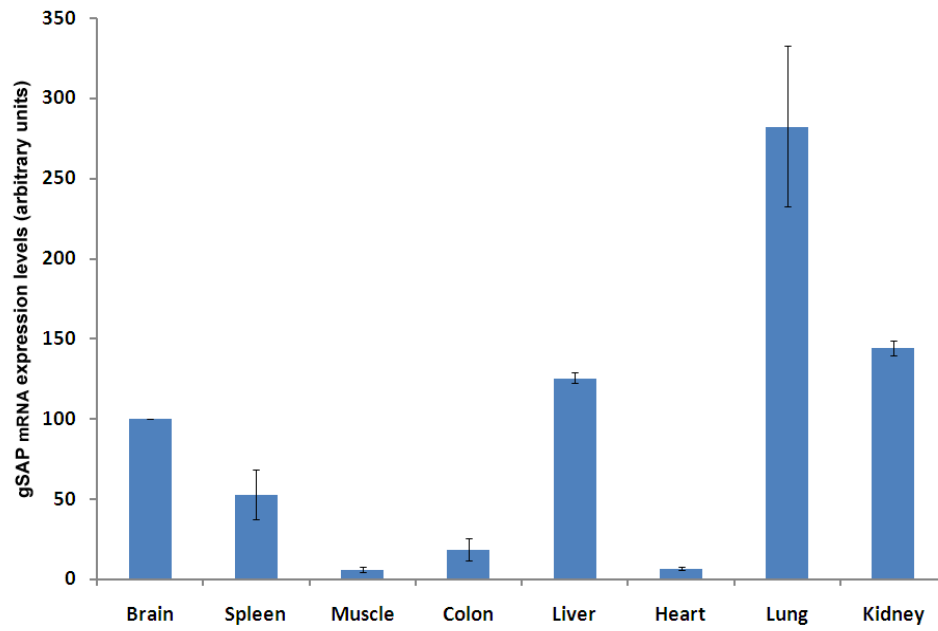

### Supplementary Figure 6

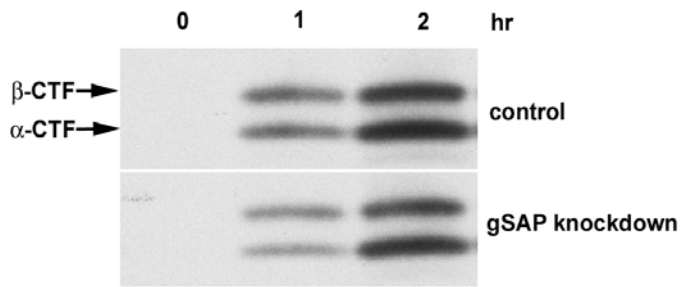

Supplementary Figure 7

**a**

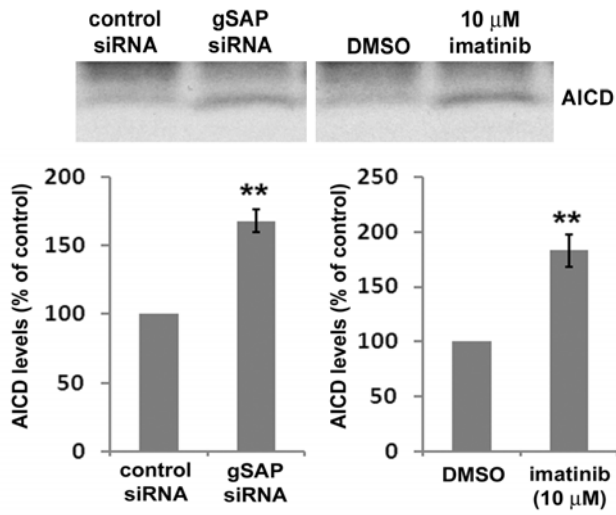

**b**

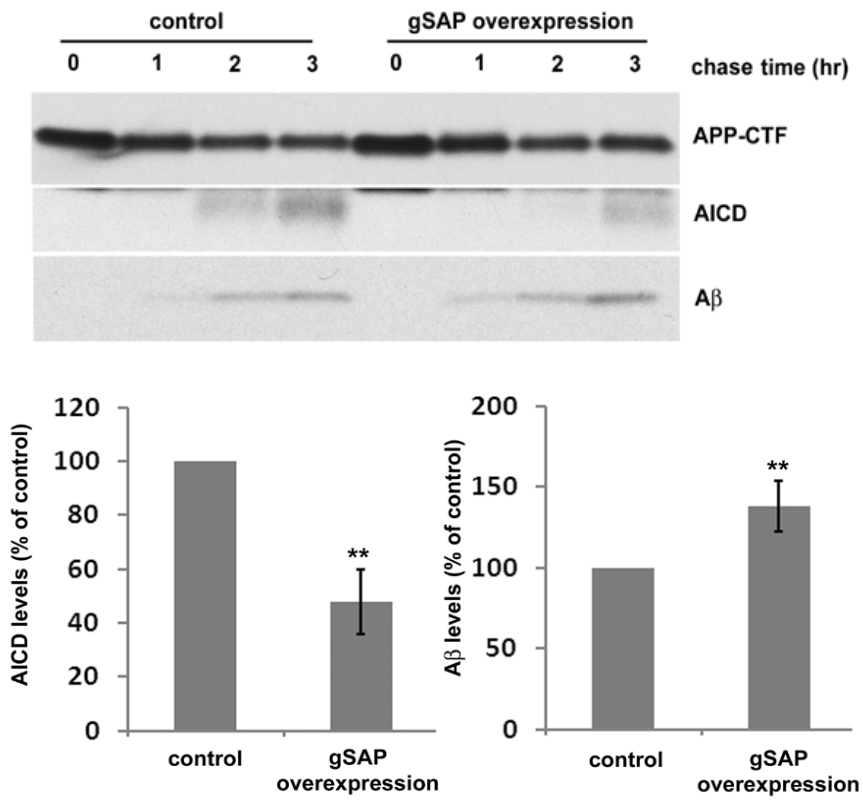

### Supplementary Figure 8

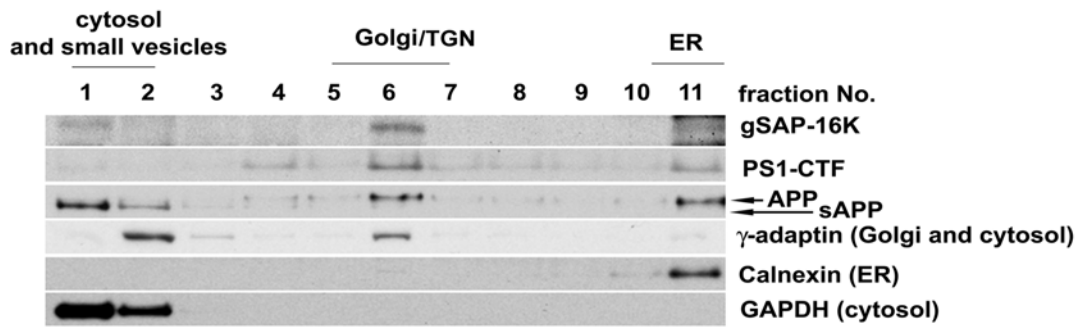



Supplementary Figure 9

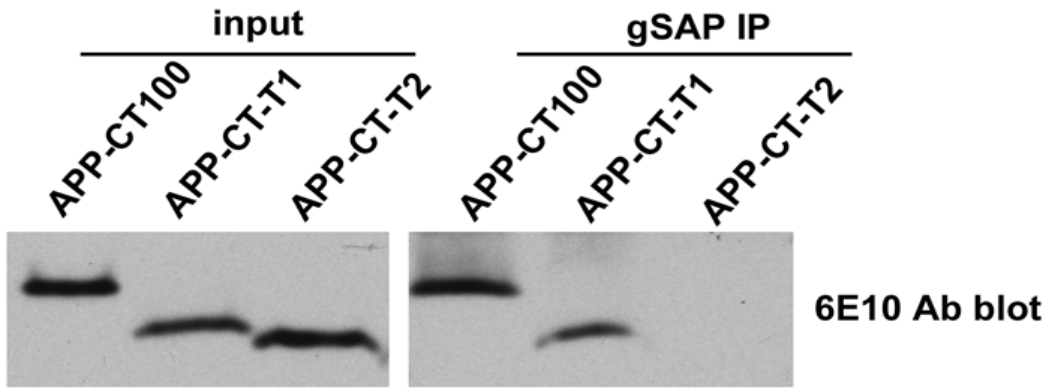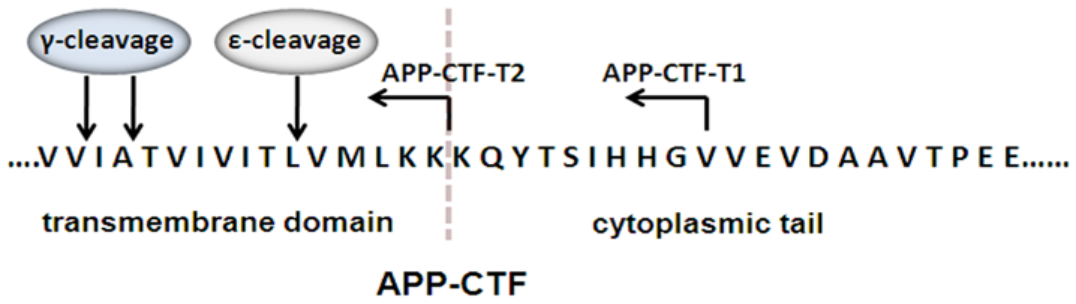

Supplementary Figure 10

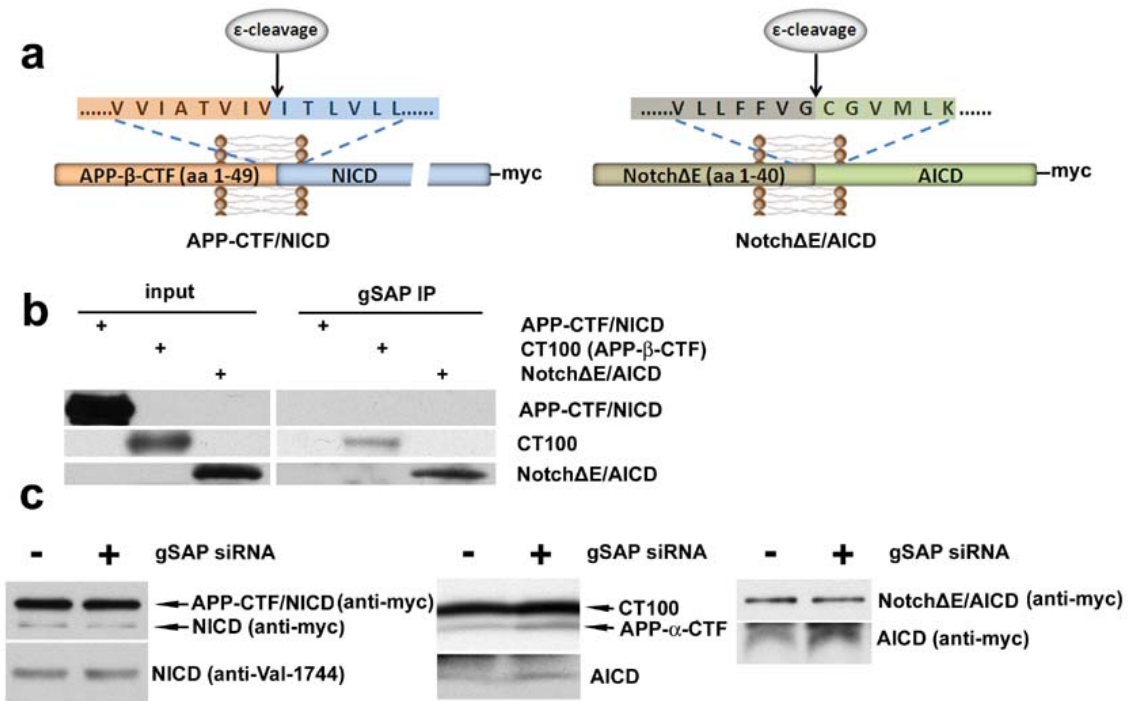

Supplementary Figure 11

**a**

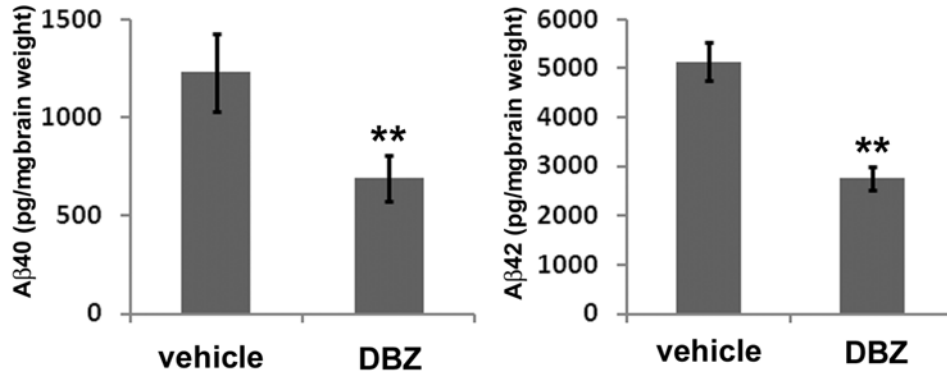

**b**

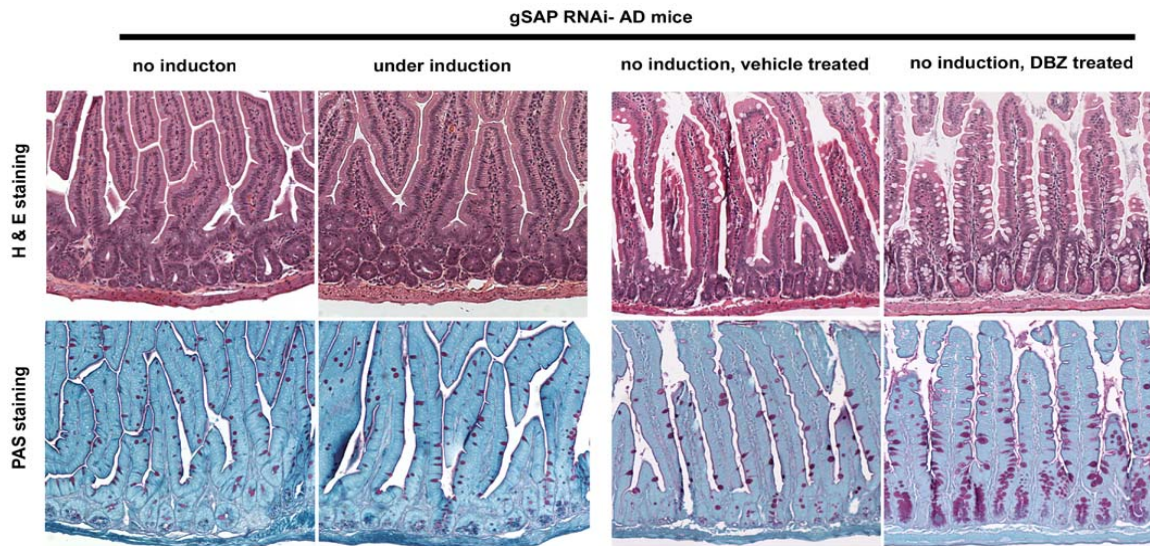

Supplement: NIHMS219773-supplement-1.pdf [file NIHMS219773-supplement-1.pdf]
